# Supplementary material
Source: PubMed Central journal article supplement (PMC6112120)
Supplement: NIHMS985662-supplement-1.pdf [file NIHMS985662-supplement-1.pdf]

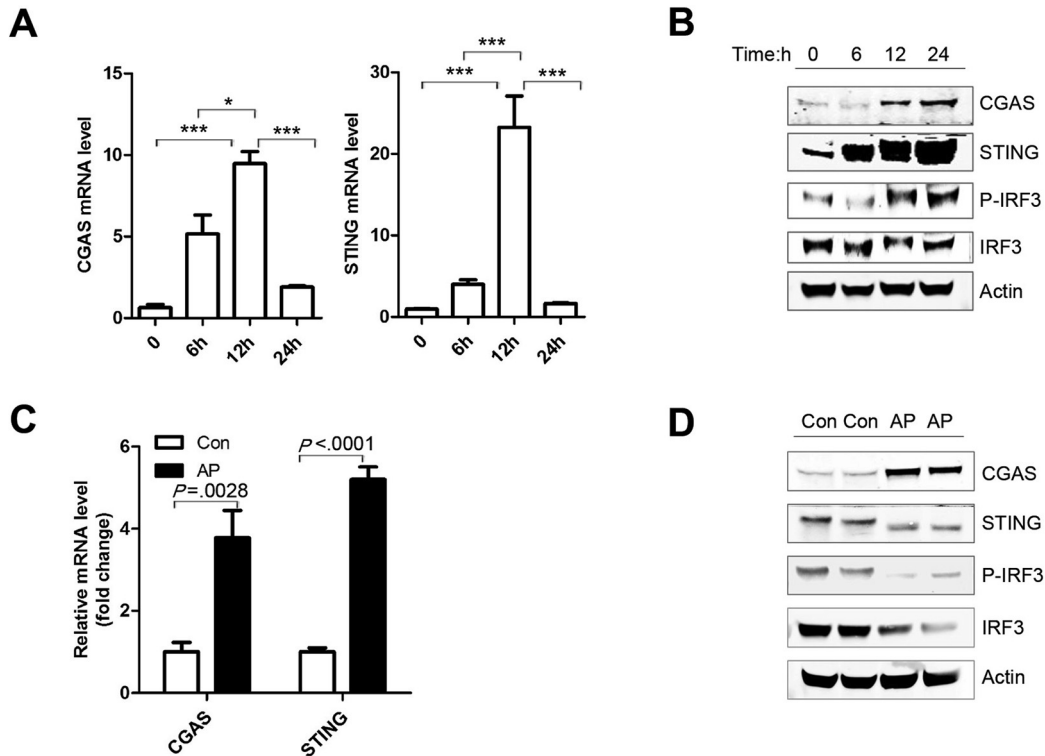

**Supplementary Figure 1.** cGAS-STING expression and signaling over time in total and acinar cells in AP. (A) Total pancreas homogenates were obtained from 7 hourly cerulein-injected C57BL/6J AP mice euthanized at the indicated time points (0–24 hours). cGAS and STING mRNA as determined by quantitative polymerase chain reaction (qPCR). Data are presented as mean ± SEM from 2 independent experiments (n = 5 mice per group and per experiment). (B) Total pancreas tissue was used to determine cGAS, STING, and downstream proteins by Western blot. (C) Pancreas acinar cells were obtained from pancreas of control (saline-treated) and cerulein-treated C57BL/6J AP mice at 12 hours following first cerulein injection (50 μg/kg, 7 hourly injections). cGAS and STING mRNA as determined by qPCR. Data are represented as mean ± SEM from 2 independent experiments (n = 5 mice per group per experiment). (D) Acinar cells from experiments in (C) were used to determine cGAS, STING, and downstream proteins by Western blot.

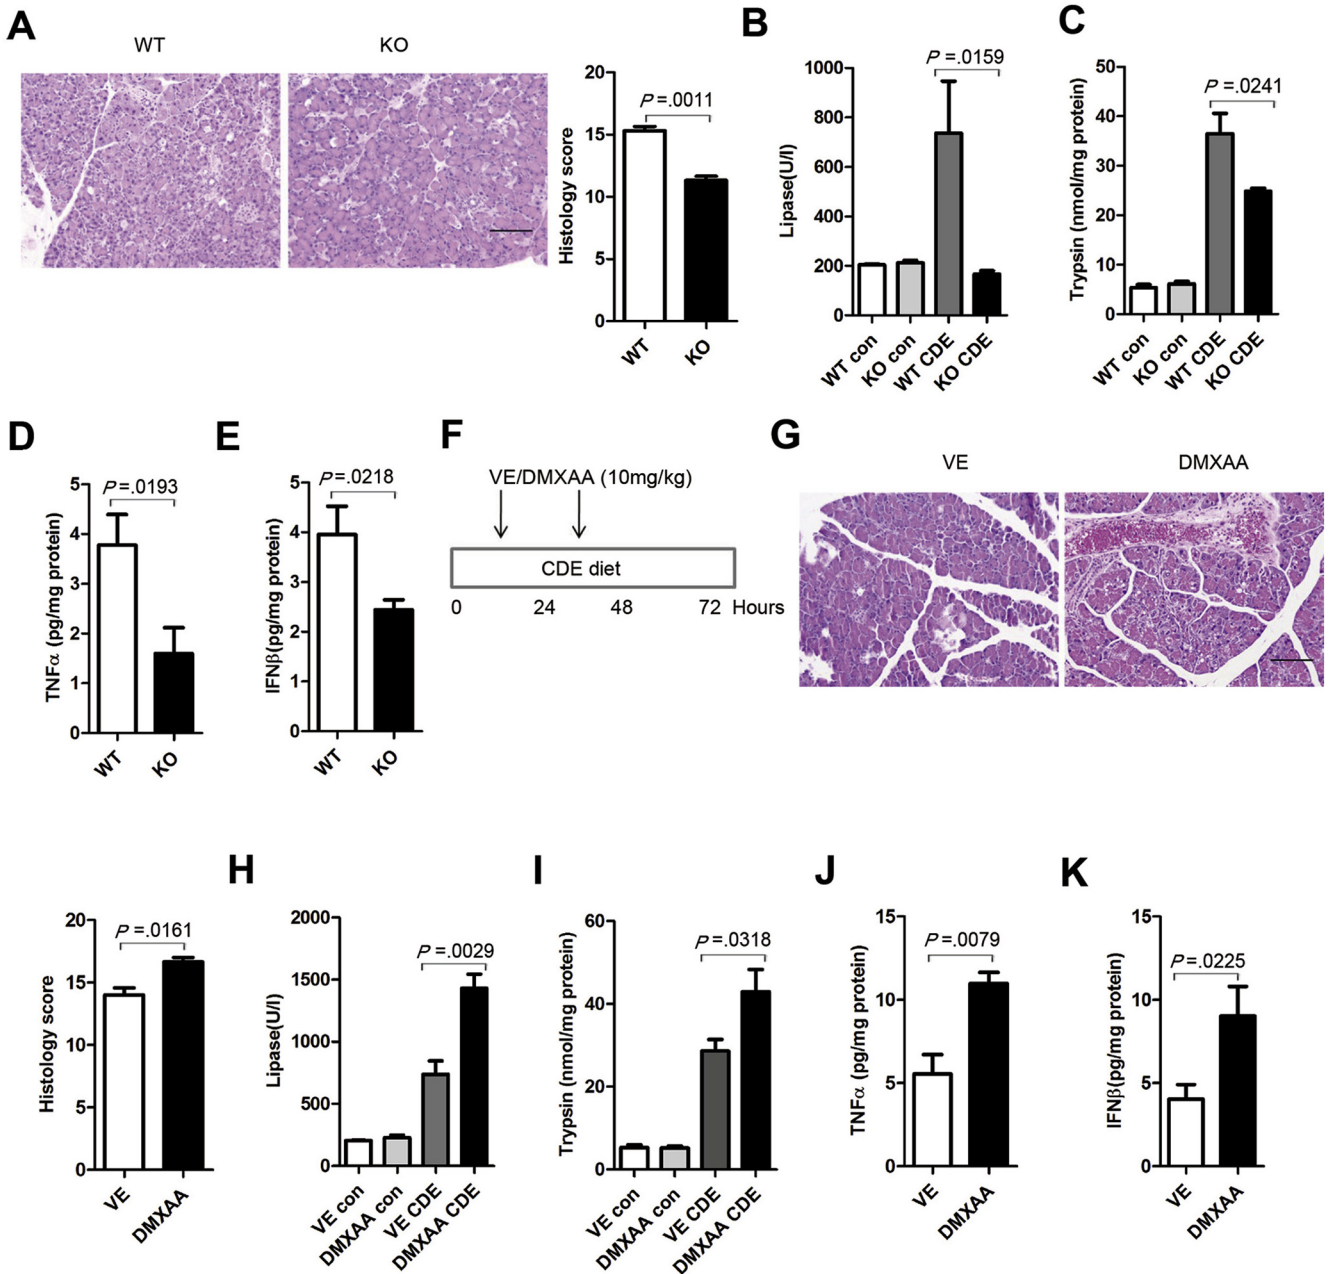

**Supplementary Figure 2.** STING signaling also plays an important role in AP induced with CDE diet feeding. (A) Representative hematoxylin-eosin (H&E) pancreas staining and histology scores of C57BL/6J WT and STING KO mice euthanized 72 hours following CDE diet feeding. (B) Serum levels of lipase in WT and STING KO mice. (C) Pancreas trypsin activity from WT and STING KO mice. (D, E) Bar graphs show pancreas TNF $\alpha$  and IFN $\beta$  from WT and STING KO mice. (F) DMXAA treatment of AP mice induced with 72 hours of CDE diet feeding. DMXAA (10 mg/kg) or vehicle control (VE) was administered intraperitoneally at 6 hours and 36 hours post initiation of CDE diet feeding. (G) Representative H&E pancreas staining and histology scores of mice at 72 hours following CDE diet feeding. (H) Serum levels of lipase in VE and DMXAA-treated mice. (I) Pancreas trypsin activity from VE and DMXAA-treated mice. (J, K) Bar graphs show pancreas TNF $\alpha$  and IFN $\beta$  from VE and DMXAA-treated mice. All data are presented as mean  $\pm$  SEM of 3 independent experiments (n = 5 mice per group and per experiment).
